# Supplementary material for: A two-in-one fluorescent sensor with dual channels to detect Zn2+ and Cd2+
Source: Royal Society of Chemistry journal article supplement (doi:10.1039/c3ra44591g), 2013-01-01
Supplement: c3ra44591g.pdf [file c3ra44591g.pdf]

## Supporting Information

### **A Two-In-One Fluorescent Sensor With Dual Channels to Discriminate Zn<sup>2+</sup> and Cd<sup>2+</sup>**

Li-Kun Zhang,<sup>a</sup> Guang-Fu Wu,<sup>a</sup> Ying Zhang,<sup>b</sup> Yan-Cong Tian,<sup>c</sup> Qing-Xiao Tong,<sup>\*a</sup> and  
Dan Li<sup>\*a</sup>

#### **Contents**

**Materials and Instrument**

**Preparation of 2-MZ**

**Characterization of 2-MZ**

**Job's plot**

**Value of Detection Limit**

**Determination of  $K_d$**

**pH influence**

**Excitation spectrum**

**Spectrum changes of 2-MZ-Cd<sup>2+</sup> upon addition of Zn<sup>2+</sup>**

**Theoretic Calculations**

**Cell culture and confocal imaging**

## Materials and Instrument

Unless otherwise noted, materials were obtained from commercial suppliers and were used without further purification.  $^1\text{H}$  NMR spectra were recorded on a Bruker Avance 400 spectrometer (400 MHz) using TMS as internal standard. Mass spectra (MALDI-TOF) were obtained Autotlex III spectrometers. Steady-state emission spectra were recorded at ambient temperature on a Hitachi F-7000 Spectrophotometer and UV/Vis spectra were recorded on a Perkin-Elmer Lambda 950 UV-visible spectrophotometer.

## Preparation of 2-MZ

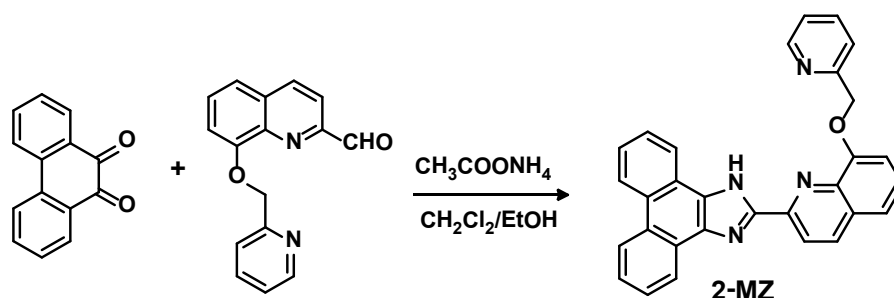

Scheme S1 Synthesis route of 2-MZ

9, 10-phenanthrenequinone (0.21 g, 1 mmol), ammonium acetate (0.75 g, 10 mmol) were added to the solution of ethanol and dichloromethane (1:1, v/v). After refluxing for 10 min, 8-pyridylmethoxy-quinoline-2-carbaldehyde<sup>1</sup> (0.32 g, 1.2 mmol) and a catalyst amount of glacial acetic acid were added. The reaction mixture was held at reflux for another 3 h. After cooling to room temperature, the mixture was filtered. The solid was purified by column chromatography on silica gel to obtain 2-MZ as a yellow solid in 32% yield.  $^1\text{H}$  NMR (400 MHz,  $\text{DMSO}-d_6$ , TMS)  $\delta_{\text{H}}$ [ppm]: 13.99 (s, 1H), 8.97 (d,  $J = 7.8$  Hz, 1H), 8.89 (dd,  $J = 12.0, 8.5$  Hz, 2H), 8.67 (d,  $J = 7.9$  Hz, 1H), 8.62 (dd,  $J = 7.4, 4.8$  Hz, 2H), 8.54 (d,  $J = 8.7$  Hz, 1H), 7.89-7.83 (m, 1H), 7.83-7.73 (m, 3H), 7.68 (dd,  $J = 12.3, 6.9$  Hz, 2H), 7.64-7.60 (m, 1H), 7.52 (t,  $J = 7.9$  Hz, 1H), 7.39-7.35 (m, 1H), 7.32 (d,  $J = 6.9$  Hz, 1H), 5.64 (s, 2H). HRMS(ESI<sup>+</sup>): calcd. for  $\text{C}_{30}\text{H}_{20}\text{N}_4\text{O}$ ,  $[\text{M}+\text{H}]^+$  453.1710, found 453.1673.  $[\text{M}+\text{Na}]^+$  475.1529, found 475.1500.

## Reference

1. L. Xue, H. H. Wang, X. J. Wang and H. Jiang, *Inorg. Chem.*, 2008, **47**, 4310.

## Characterization of 2-MZ

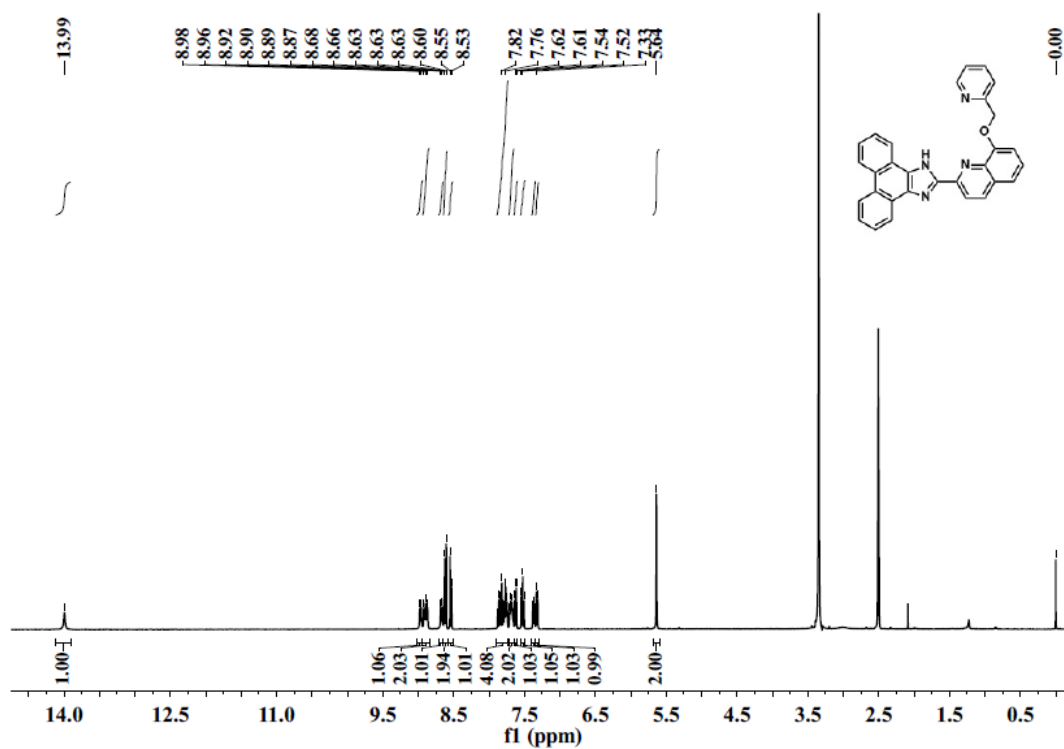

Fig. S1  $^1\text{H}$  NMR of 2-MZ in  $\text{DMSO-}d_6$

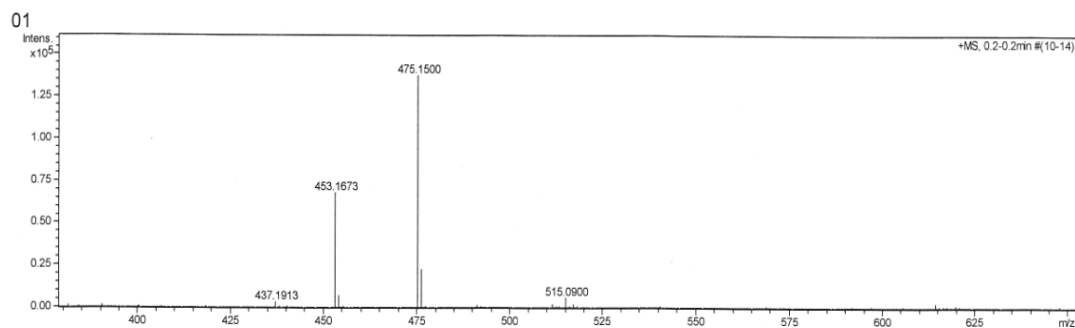

Fig. S2 ESI-MS spectrum (positive mode) of 2-MZ. Peak at  $m/z$  453.1673 corresponds to  $[2\text{-MZ} + \text{H}]^+$ ,  $m/z$  475.1500 corresponds to  $[2\text{-MZ} + \text{Na}]^+$

## Job's plot

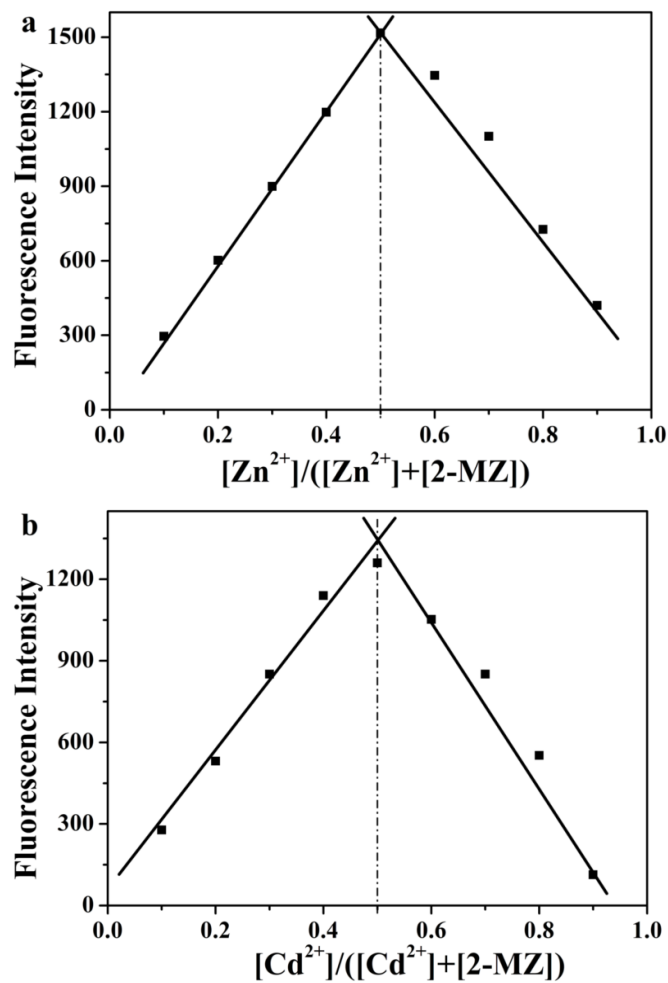

Fig S3 Job's plot for determining the stoichiometric ratio between 2-MZ and  $Zn^{2+}$  (a) or 2-MZ and  $Cd^{2+}$  (b), where the variations of fluorescence intensity as a function of molar ratio  $X_M$ . The sum of 2-MZ and  $Zn^{2+}$  or  $Cd^{2+}$  concentrations is 10  $\mu M$

## Value of Detection Limit

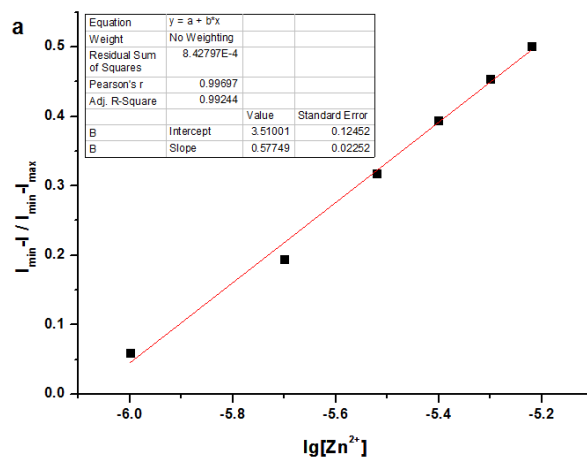

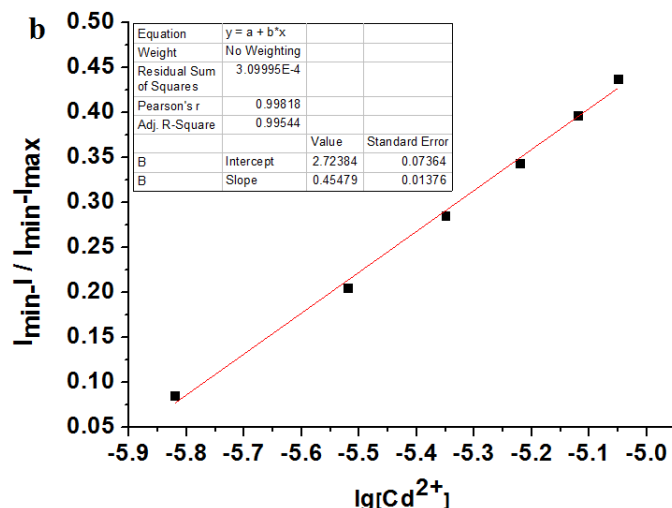

Fig S4 Fitting of fluorescence titration curve of 2-MZ and Zn<sup>2+</sup> (a) or 2-MZ and Cd<sup>2+</sup> (b).

## Determination of $K_d$

The apparent dissociation constants ( $K_d$ ) of 2-MZ with Zn<sup>2+</sup> and Cd<sup>2+</sup> were determined using the nonlinear least-squares analysis based on a 1:1 complex expression:

$$F = F_0 + \frac{F_{\max} - F_0}{2} \left\{ 1 + \frac{C_M}{C_L} + \frac{1}{K_S C_L} - \left[ \left( 1 + \frac{C_M}{C_L} + \frac{1}{K_S C_L} \right)^2 - 4 \frac{C_M}{C_L} \right]^{1/2} \right\}$$

Where  $F$  and  $F_0$  are the fluorescence intensities of 2-MZ in the presence and absence of Zn<sup>2+</sup> or Cd<sup>2+</sup>,  $C_M$  and  $C_L$  are the concentrations of Zn<sup>2+</sup> or Cd<sup>2+</sup> and 2-MZ, and  $K_S$  is the stability constant.

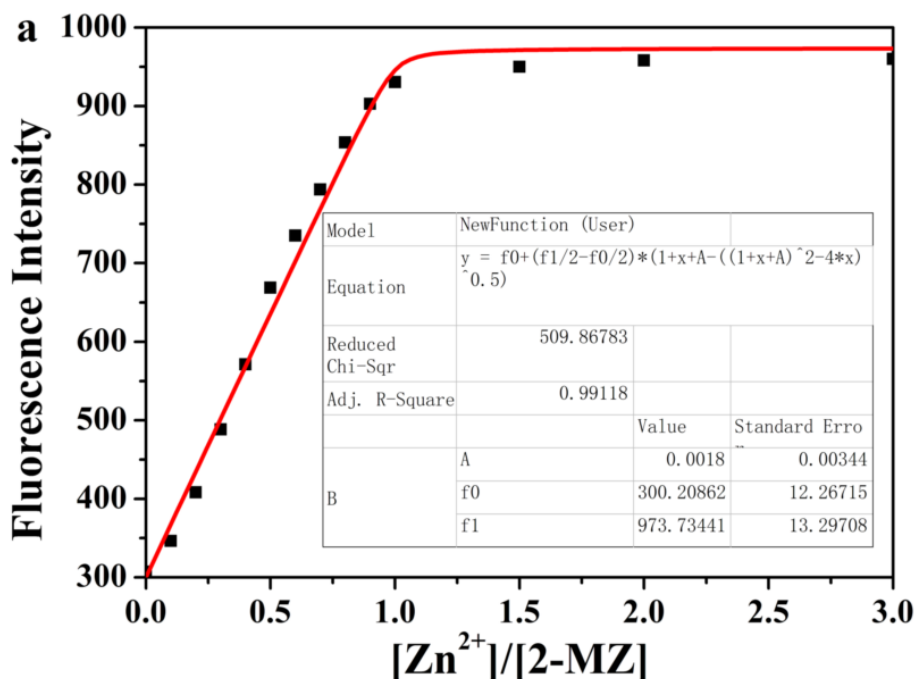

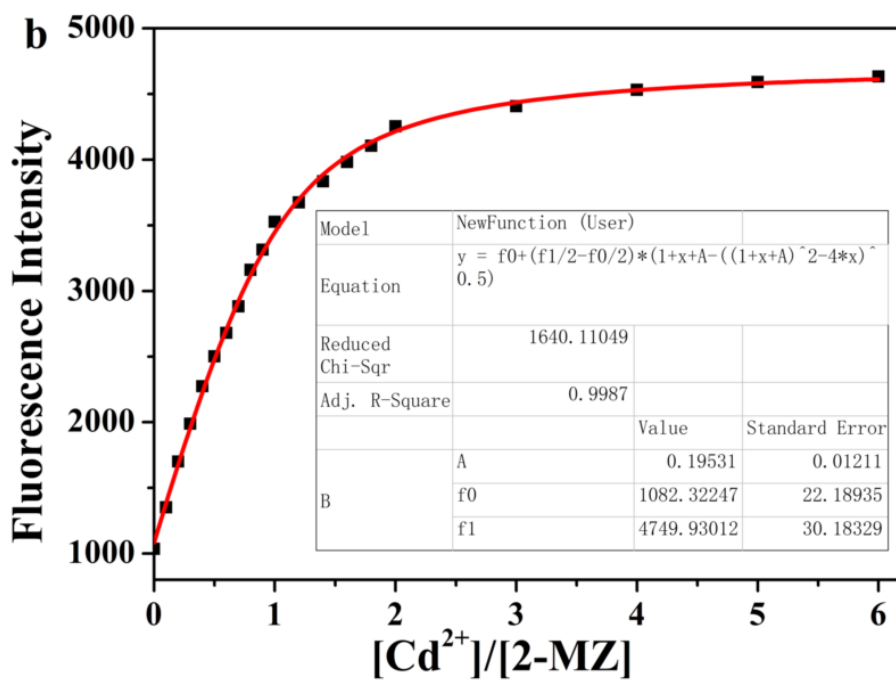

Fig. S5 (a) A nonlinear fitting curve of the fluorescence intensity of 2-MZ versus  $[Zn^{2+}]/[2-MZ]$  at 525 nm. (b) A nonlinear fitting curve of the fluorescence intensity of 2-MZ versus  $[Cd^{2+}]/[2-MZ]$  at 490 nm.

## pH influence

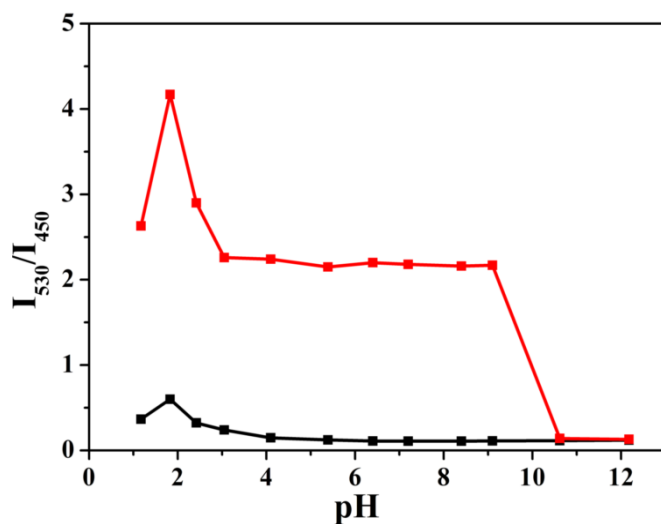

Fig. S6 Emission ratio ( $I_{530}/I_{450}$ ) of 2-MZ vs. pH values in the absence (black line) and in the presence (red line) of  $Zn^{2+}$ . Excitation at 375 nm.

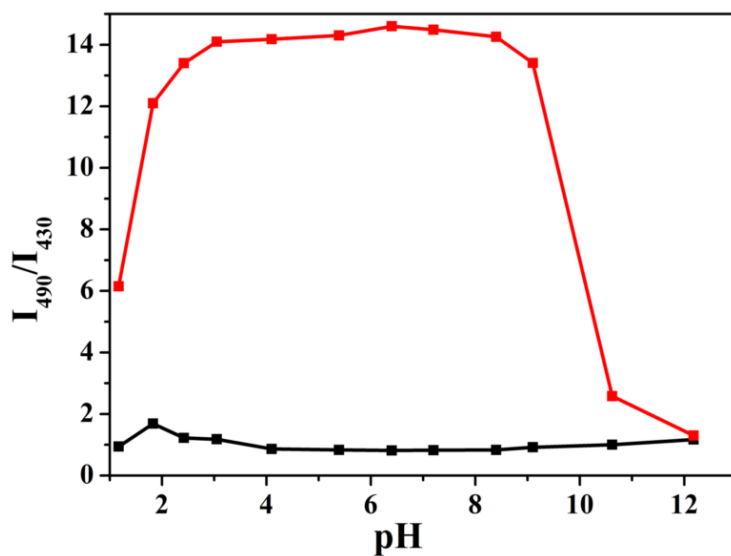

Fig. S7 Emission ratio ( $I_{490}/I_{430}$ ) of 2-MZ vs. pH values in the absence (black line) and in the presence (red line) of  $\text{Cd}^{2+}$ . Excitation at 375 nm.

## Excitation spectrum

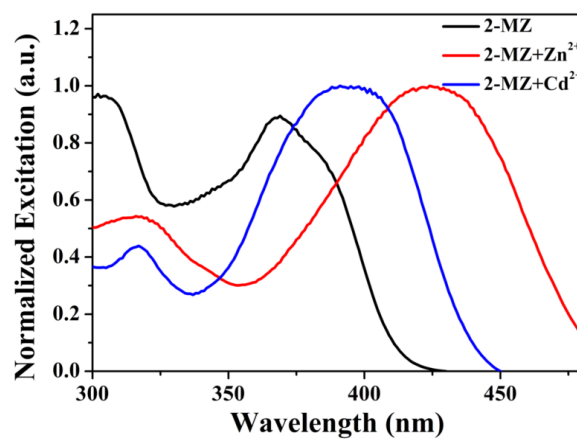

Fig. S8 (a) Excitation spectral changes of 2-MZ (10  $\mu\text{M}$ ) in aqueous solution (10 mM HEPES; DMF/ $\text{H}_2\text{O}$  = 1:1, v/v; pH 7.2) upon addition of  $\text{Zn}^{2+}$  and  $\text{Cd}^{2+}$ .

## Spectrum changes of 2-MZ-Cd<sup>2+</sup> upon addition of Zn<sup>2+</sup>

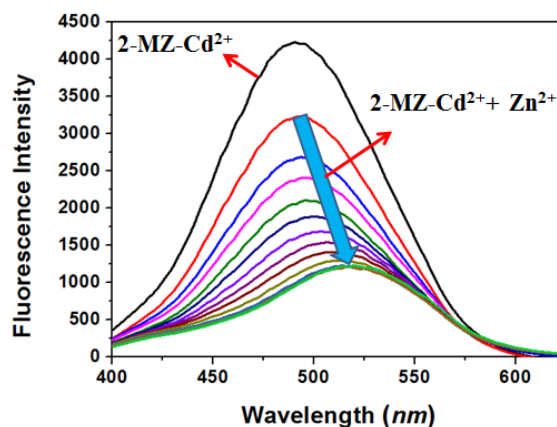

Fig. S9 Fluorescence changes of 2-MZ (10  $\mu$ M) and Cd<sup>2+</sup> (60  $\mu$ M) in aqueous solution (10 mM HEPES; DMF/H<sub>2</sub>O = 1:1, v/v; pH 7.2) upon addition of Zn<sup>2+</sup> (0 to 50  $\mu$ M).

## Theoretic Calculations

All of the ab initio calculations were carried out using Gaussian 09 program package. The geometry optimizations were performed in the solvent at B3LYP/6-311+G(d), LANL2DZ level. The solvent effect of water was evaluated by using the SMD implicit solvent model.

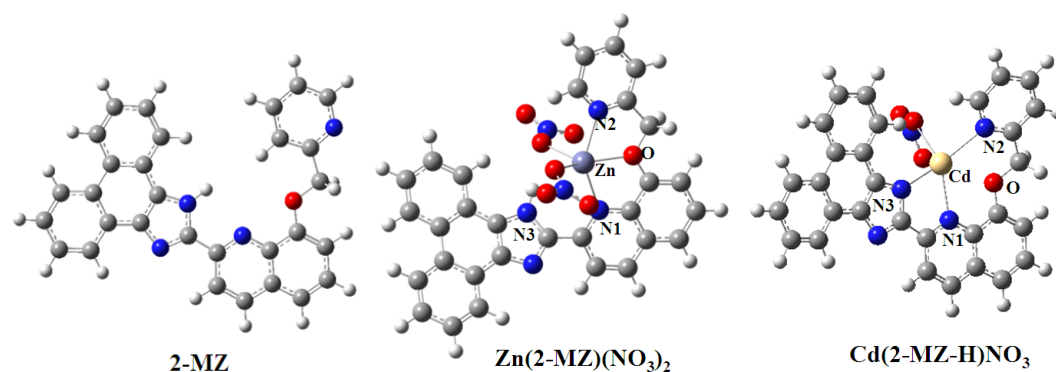

Fig. S10 B3LYP optimized geometries of 2-MZ and its complexes with Zn<sup>2+</sup> and Cd<sup>2+</sup>. Grey = C; Red = O; Blue = N; Slate Gray = Zn, Light Yellow = Cd.

Table S1 Selected Bond Distances ( $\text{\AA}$ ) for the complexes Zn(2-MZ)(NO<sub>3</sub>)<sub>2</sub> and Cd(2-MZ-H)NO<sub>3</sub>

| Compound | Zn(2-MZ)(NO <sub>3</sub> ) <sub>2</sub> | Cd(2-MZ-H)NO <sub>3</sub> |
|----------|-----------------------------------------|---------------------------|
| M-N1     | 2.29                                    | 2.43                      |
| M-N2     | 2.28                                    | 2.42                      |
| M-N3     | 3.26                                    | 2.33                      |
| M-O      | 2.28                                    | 2.60                      |

M represents the metal ion Zn or Cd



## Cell culture and confocal imaging

HepG2 cells were cultured in Dulbecco's Modified Eagle Medium (DMEM) supplemented with 10 % fetal bovine serum, penicillin (100 units/mL), streptomycin (100 mg/mL) and 5% CO<sub>2</sub> at 37 °C. The cells were cultured 3 days before dye loading onto 35-mm-diameter glass-bottomed coverslips. Then the cells were washed with PBS, bathed in serum-free DMEM containing 10 μM 2-MZ (1% DMSO) for 30 min at 37 °C, washed with PBS three times to remove the excess cell, and bathed in DMEM (2 mL) before imaging. For imaging of Zn<sup>2+</sup>, the exogenous Zn<sup>2+</sup> was introduced by incubating the cells with 50 μM ZnCl<sub>2</sub> solution for 20 min. Confocal fluorescence imaging was performed on a Zeiss LSM 510 Meta microscopy system with a 40 × oil immersion objective lens. Fluorescence at two emission channels of 420-480 nm and 505-530 nm was measured at room temperature by excitation at 405 nm.
